# Supplementary material
Source: Frontiers journal article supplement (https://www.frontiersin.org/articles/217725)
Supplement: Image_6.PDF [file Image_6.PDF]

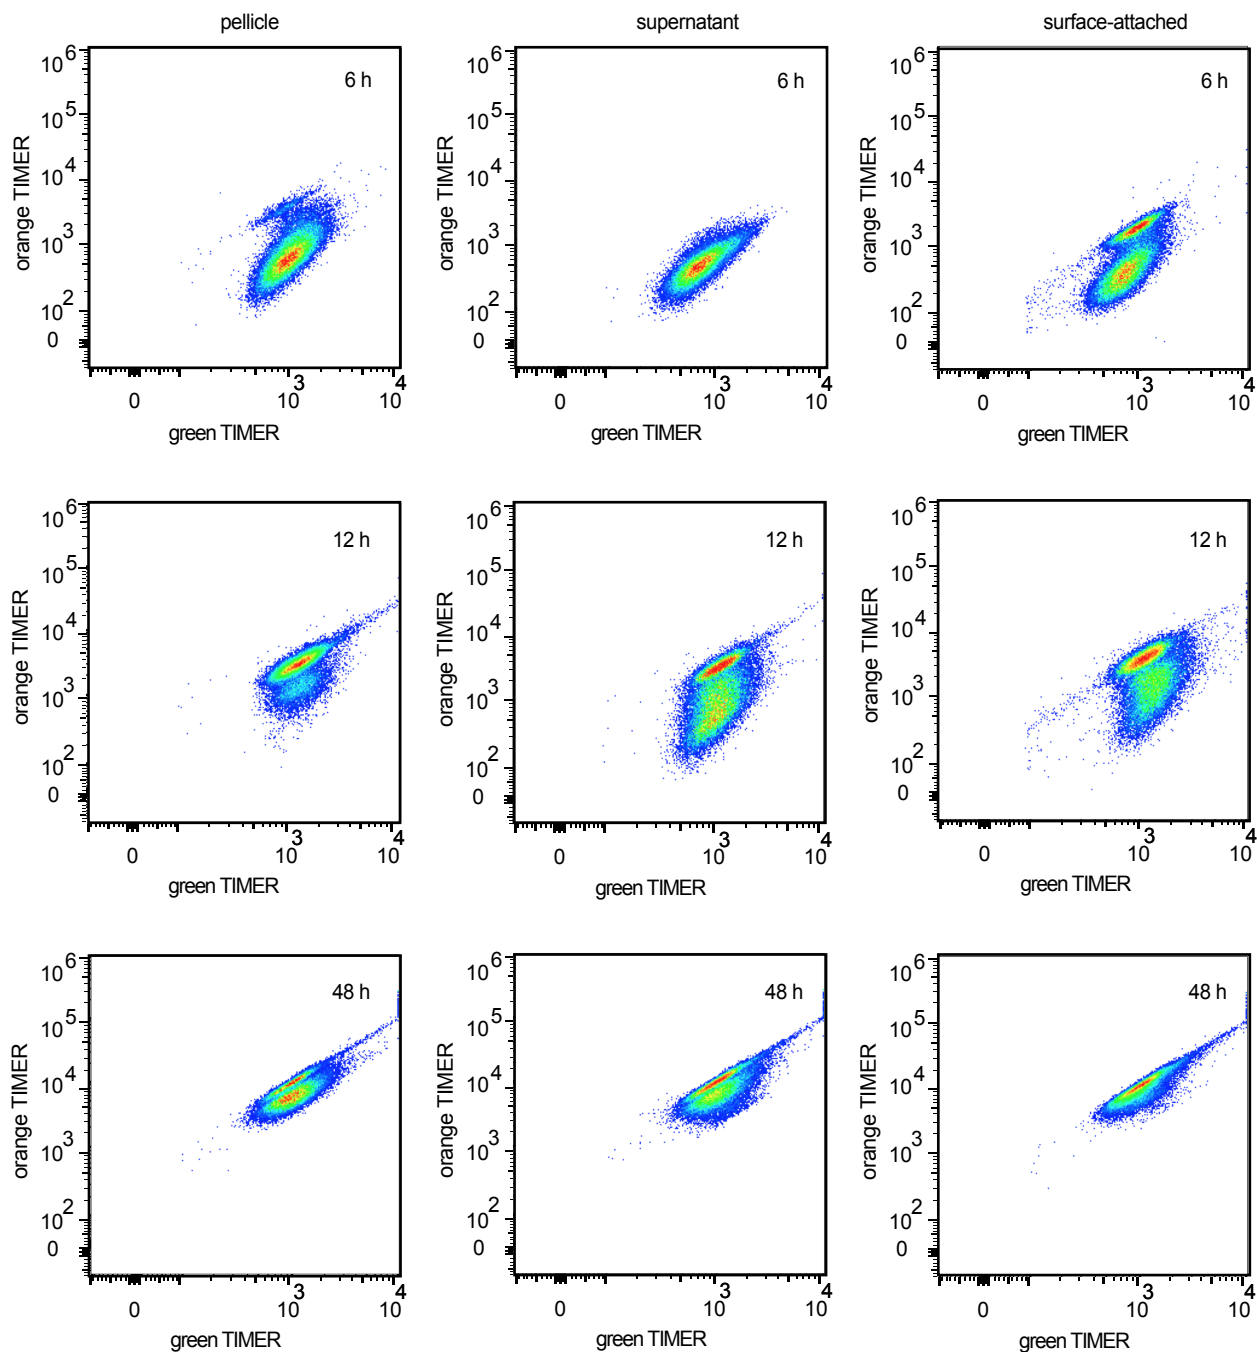

**Supplementary Figure 6. Slowly dividing cells accumulate during biofilm growth.** Scatter plots showing expression of green TIMER molecules and orange TIMER molecules in pellicle, supernatant and surface-attached cells at selected time points, measured by flow cytometry. Expression of green TIMER molecules (fast-dividing cells) and orange TIMER molecules (slow-dividing cells) are plotted on the x-axis (green TIMER) and y-axis (orange TIMER), respectively. The color scale is as in Figure 4.
