# Supplementary material
Source: Frontiers journal article supplement (https://www.frontiersin.org/articles/217725)
Supplement: Image_7.PDF [file Image_7.PDF]

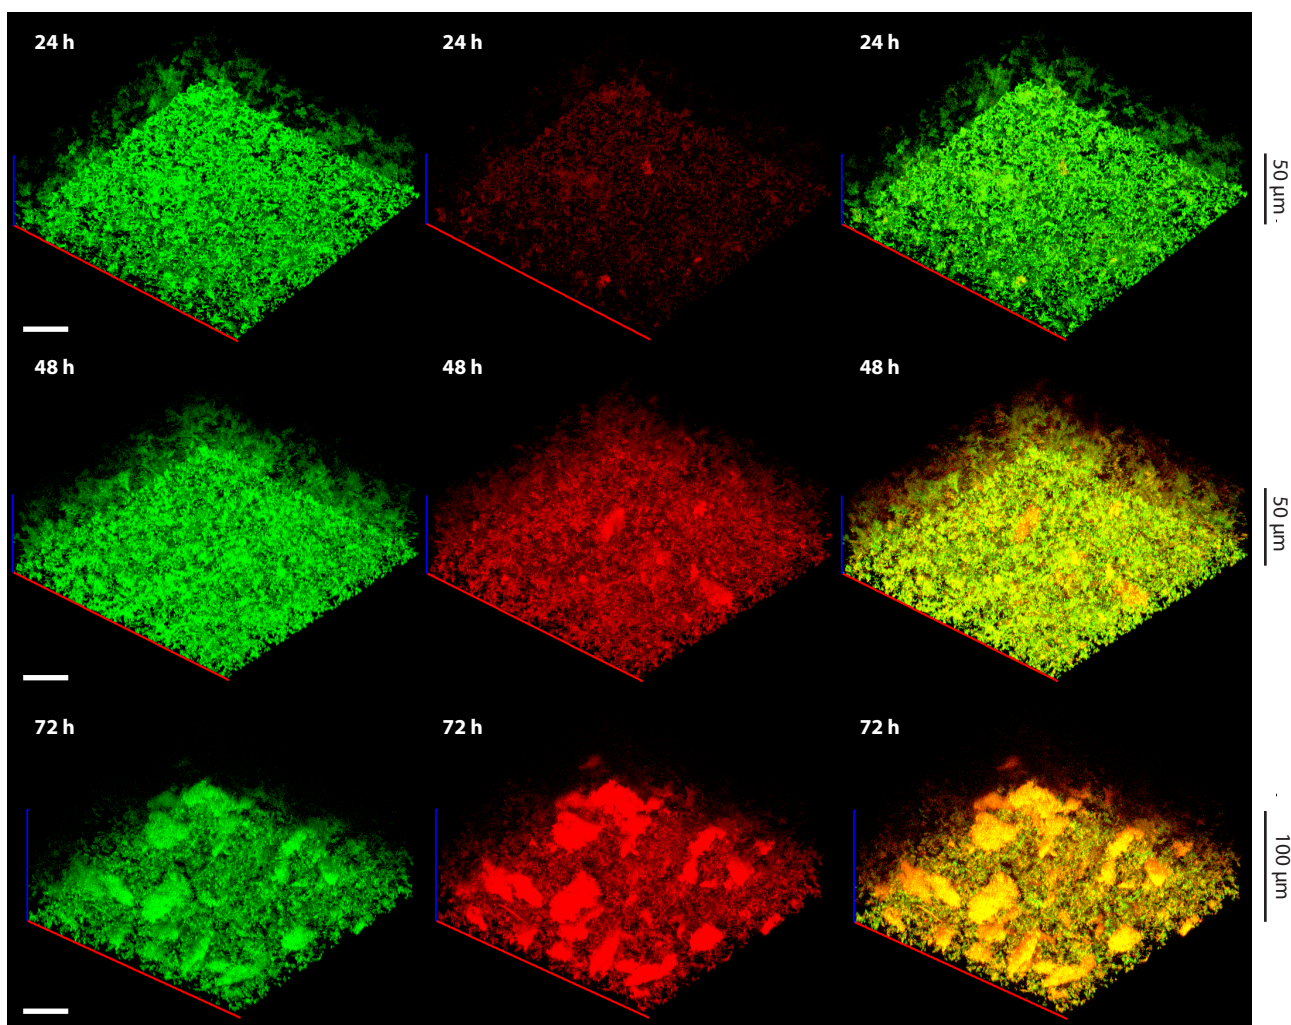

**Supplementary Figure 7. Confocal fluorescence microscopy reveals accumulation of slowly dividing cells with time specifically in dense cellular structures.** Orange TIMER molecules (red signal), which indicate slowly proliferating cells, accumulate between 24 and 72 h of biofilm growth. Scale bars, 40 μm.
